# Supplementary material for: Polyphenolic and Fruit Colorimetric Analysis of Hungarian Sour Cherry Genebank Accessions
Source: MDPI journal article supplement (doi:10.3390/agriculture13071287), 2023-06-22
Supplement: s1 [file s1]

Fruit Laboratory pictures

Szamosi meggy

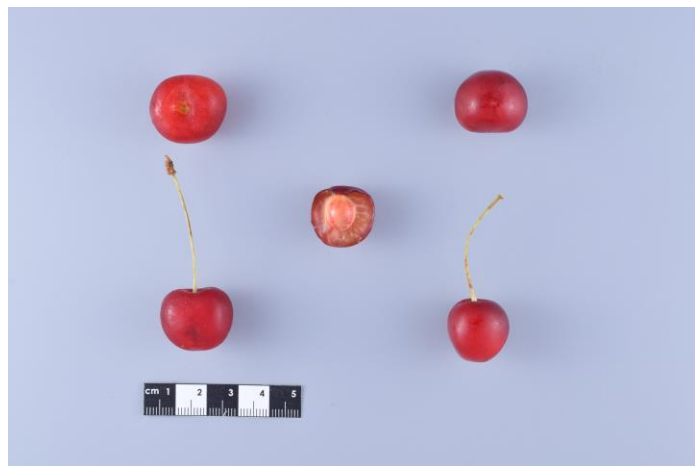

Tiszabög 50/7

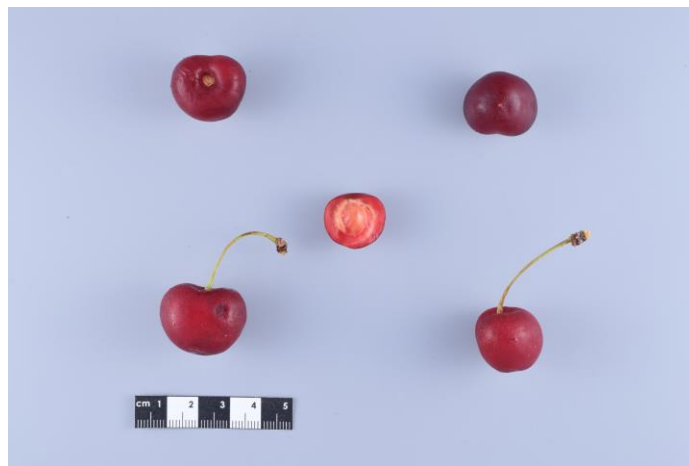

Újfehértói fürtös

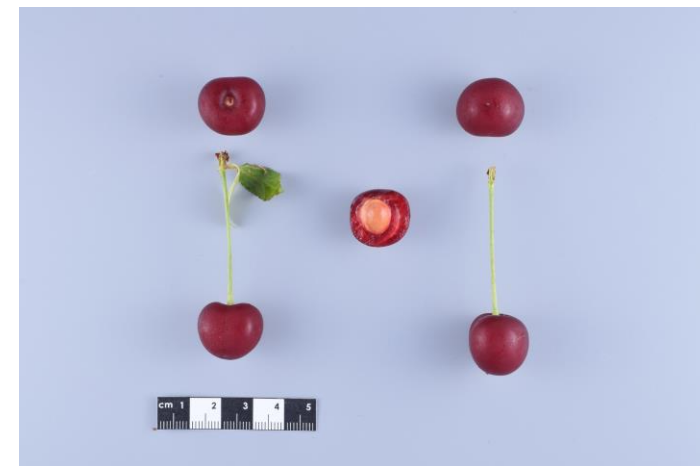

Velencei kései

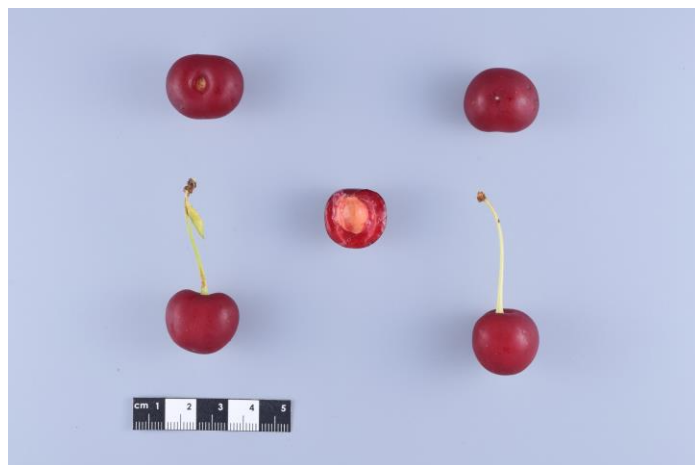

Pipacs 1

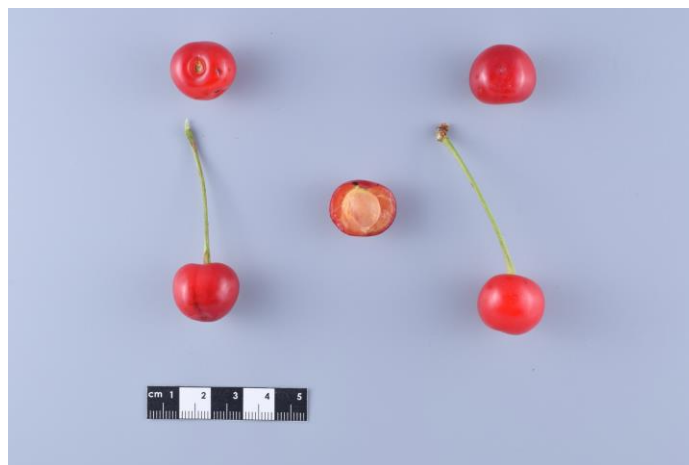

Érdi bőtermő

N.A.

Mogyoródi kései

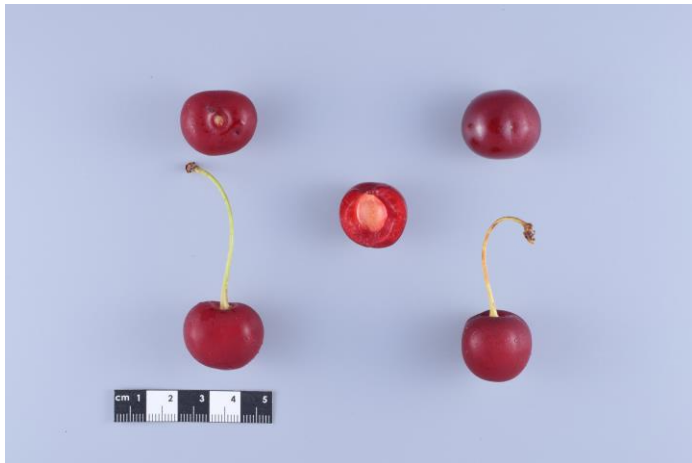

Nagy Gobet

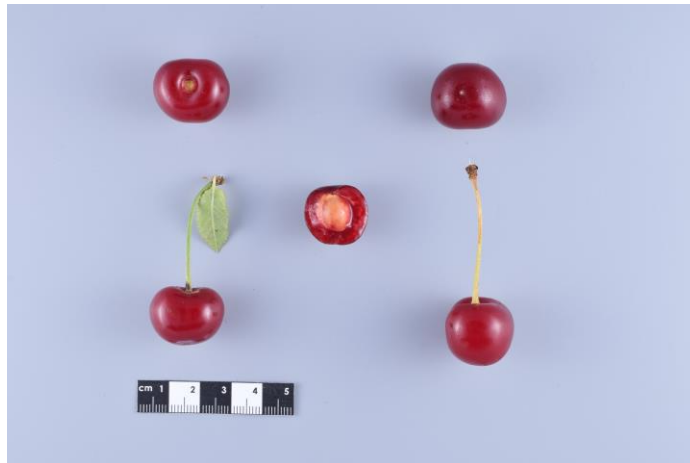

Pándy 43

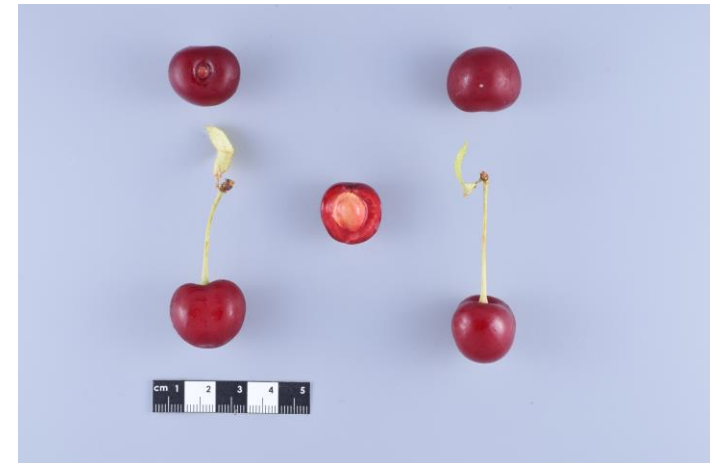

Pándy 279

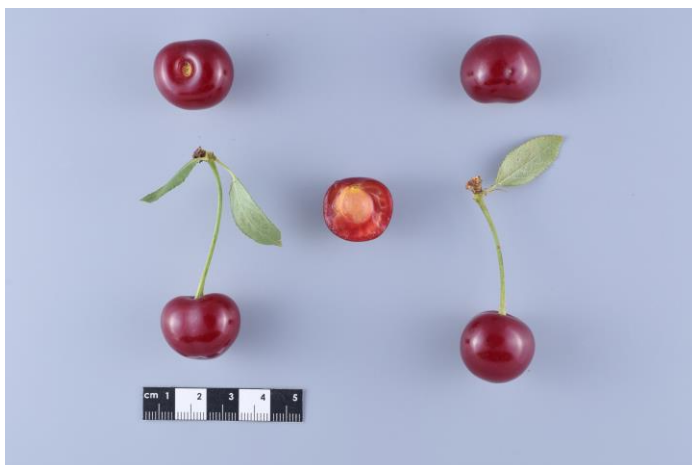

Pándy Bb. 119

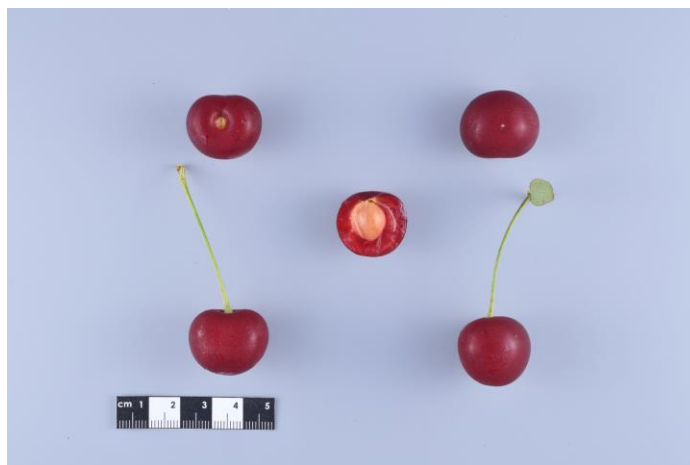

Péceli nagy

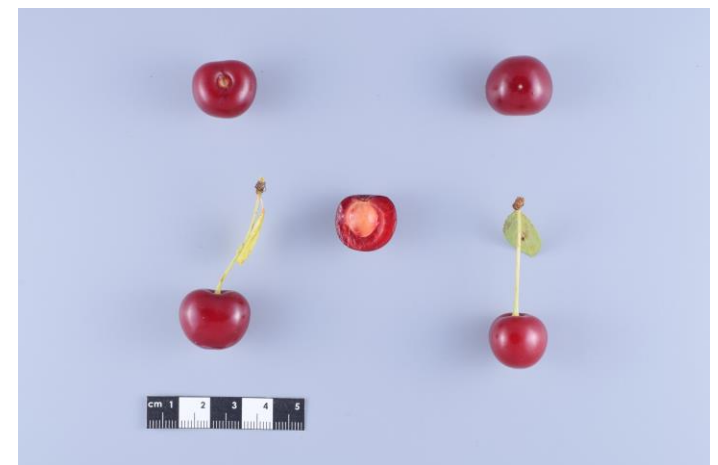

Késői cigány

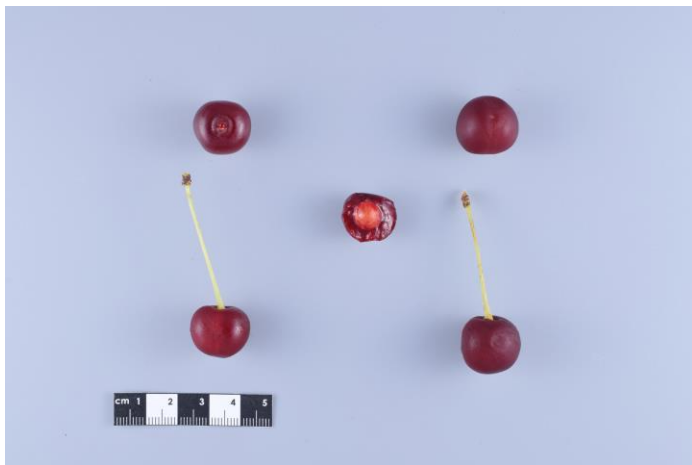

Késői parasztmeggy

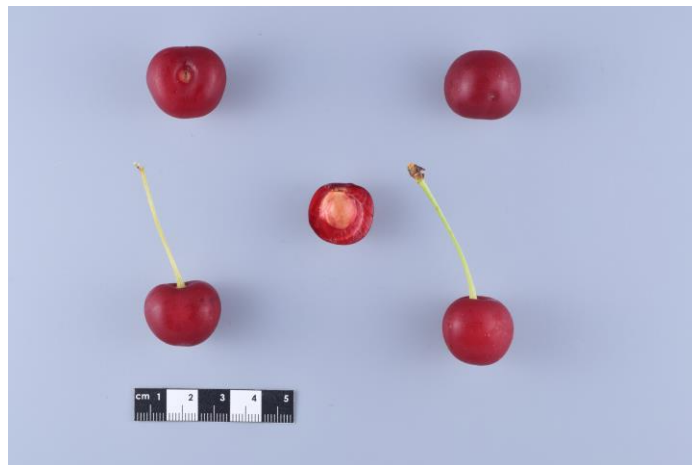

Későn virágzó

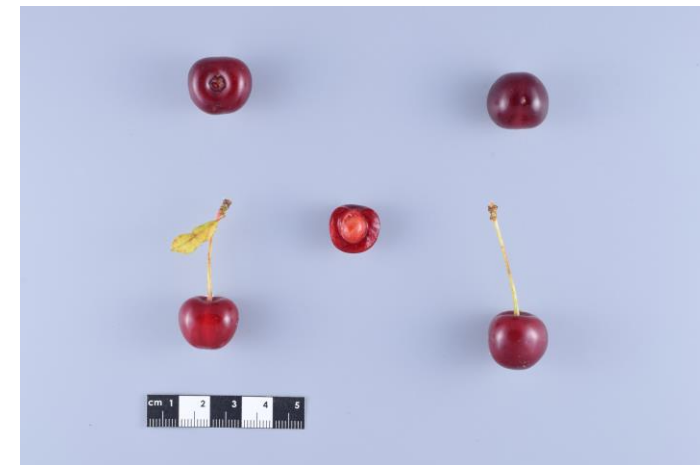

Korai cigány

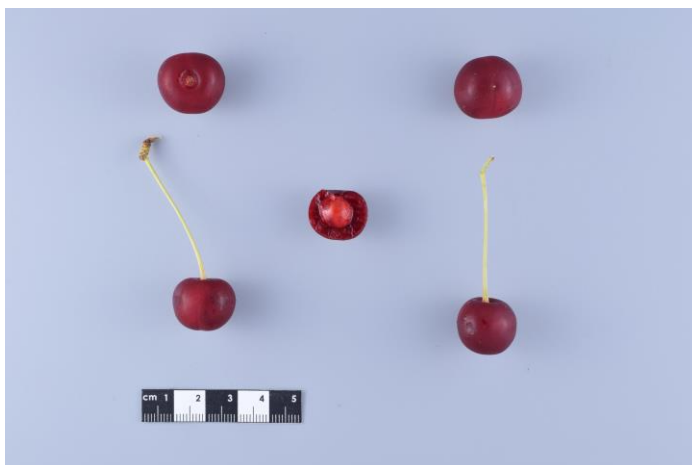

Korai Pándy

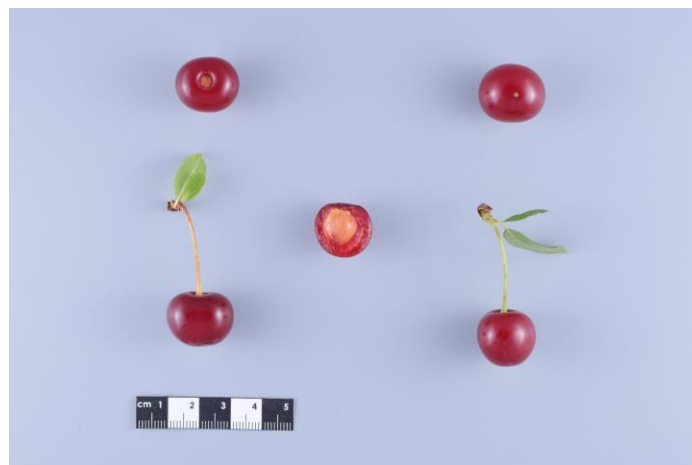

Májusi hólyag

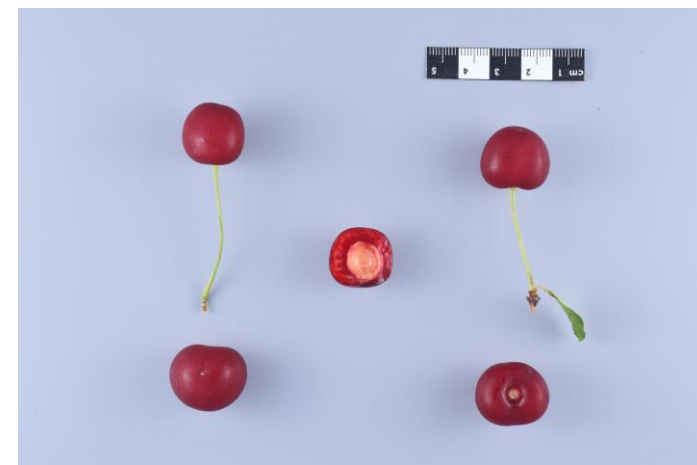

Fehérvári

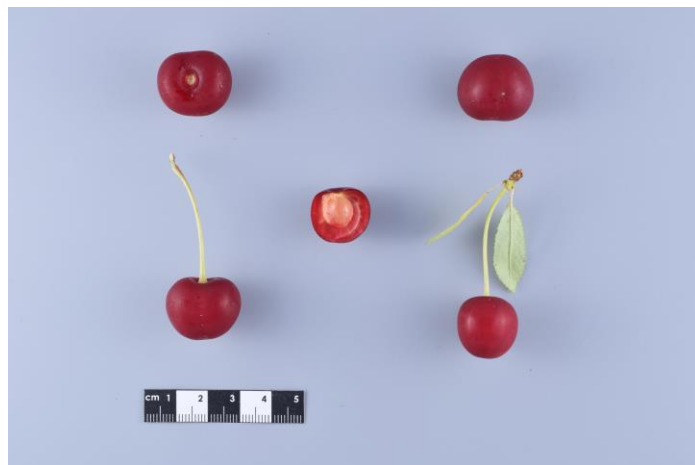

Fűzlevelű kisszemű

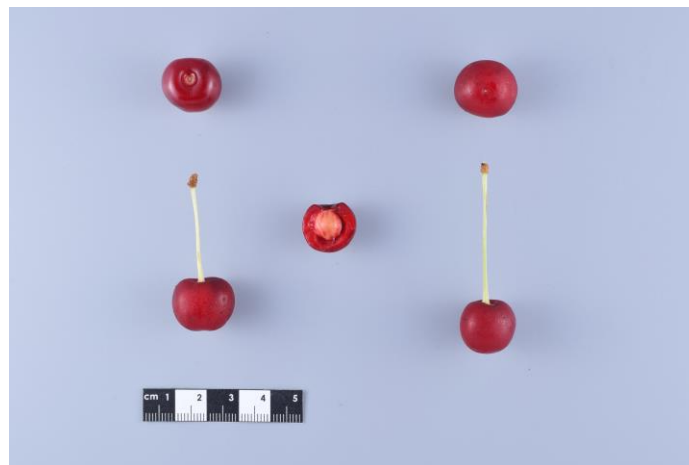

Helyi sötét

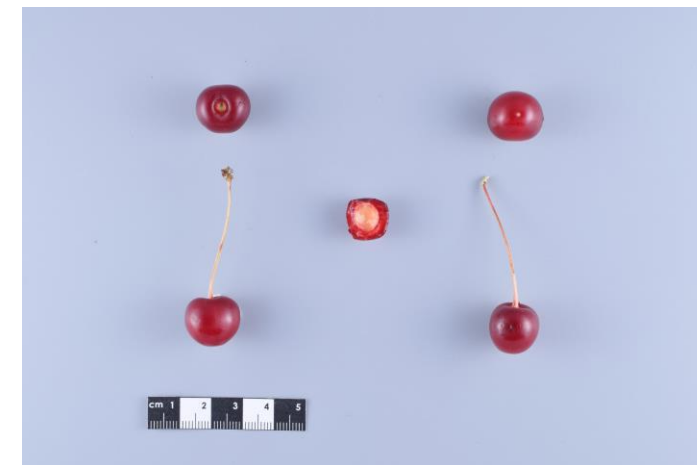

Érdi Jubileum

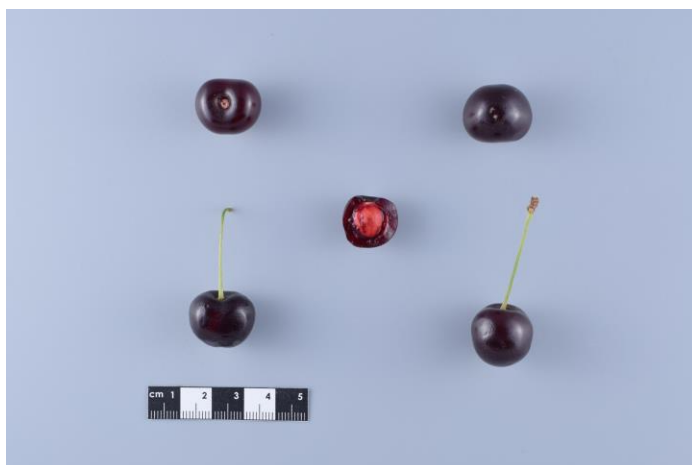

Hortenzia királynője

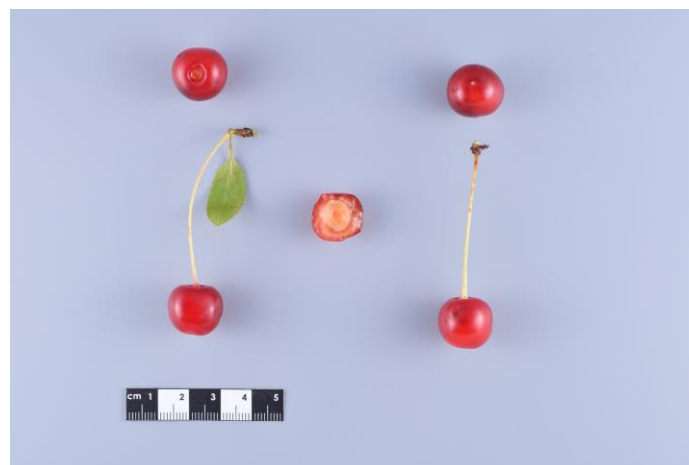

Kantorjanosi 3

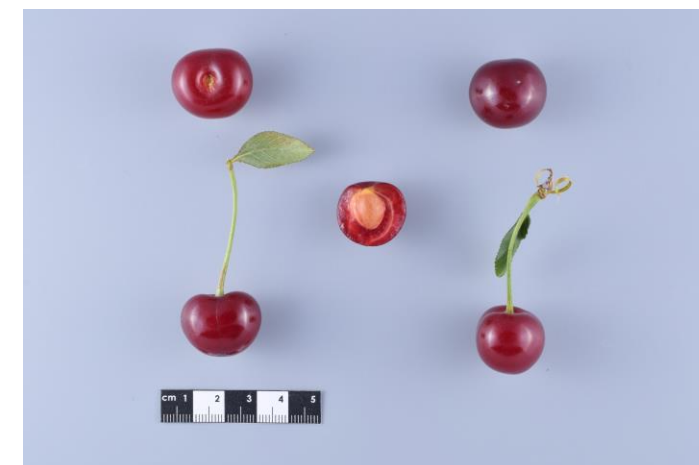

Édes pipacs

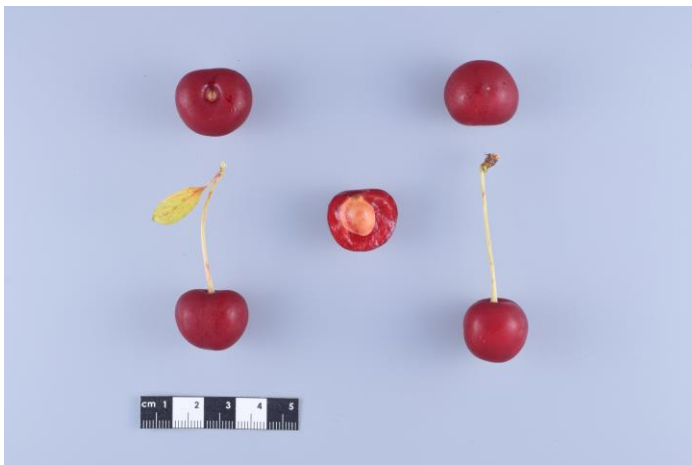

Cigánymeggy 7

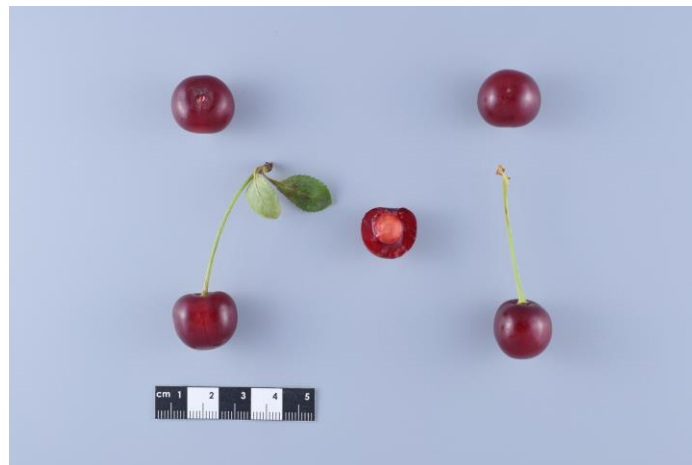

Bagy meggy

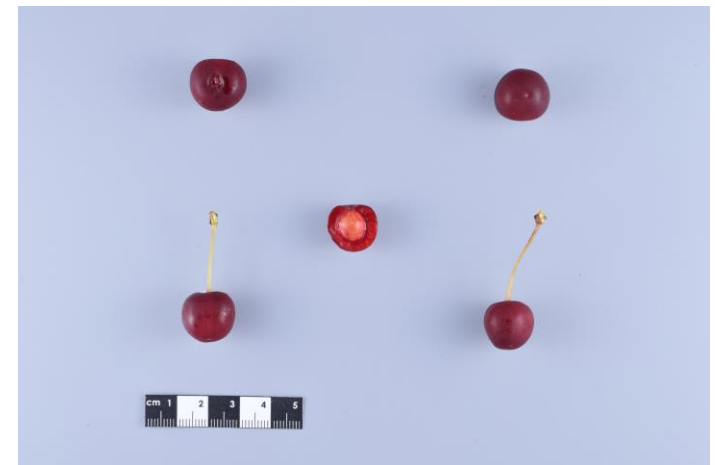

Dunabogdányi

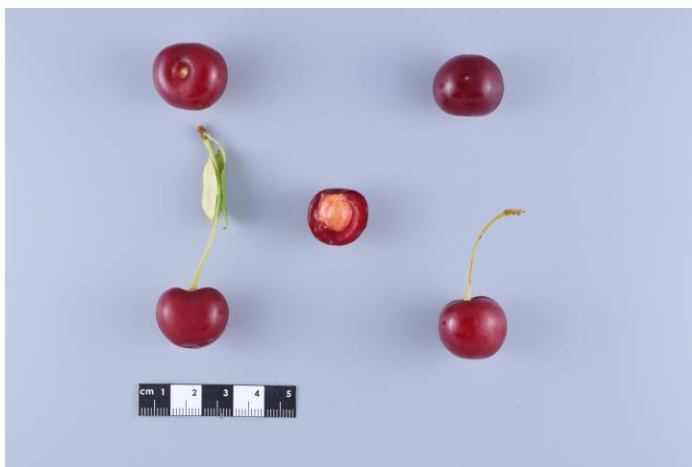

Cigány késői

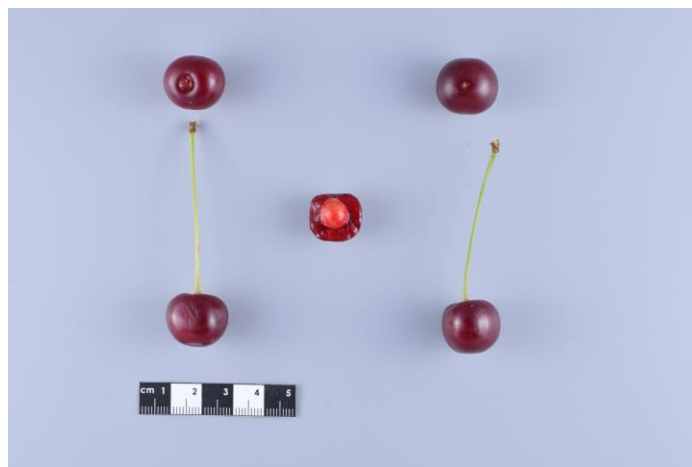

Bosnyák

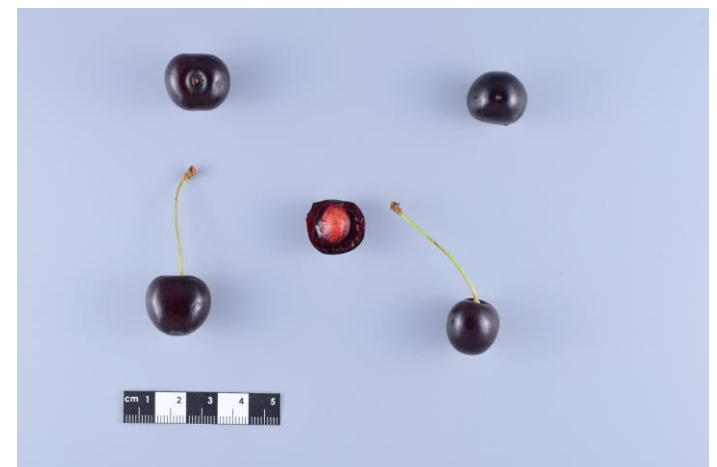

Field pictures

Szamosi meggy

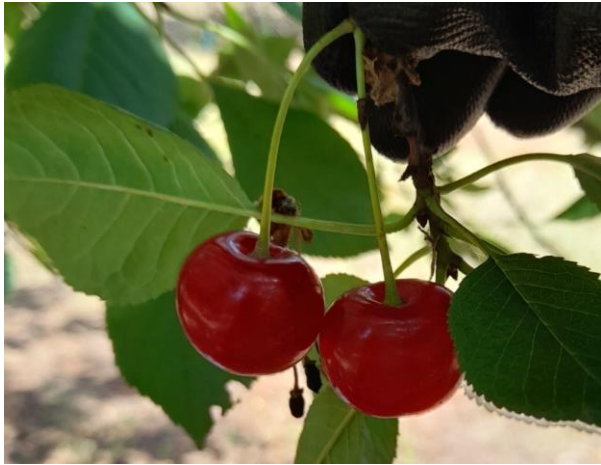

Tiszabög 50/7

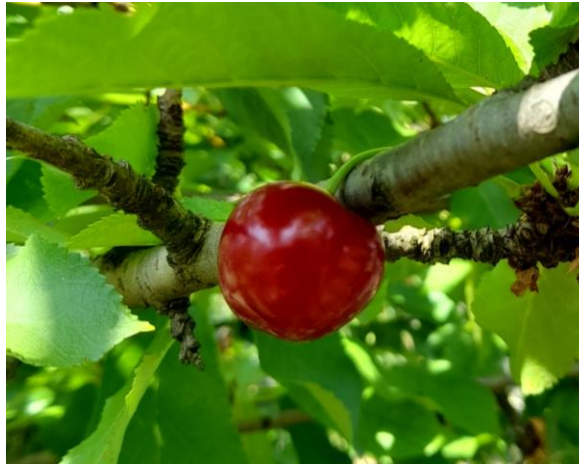

Újfehértói fürtös

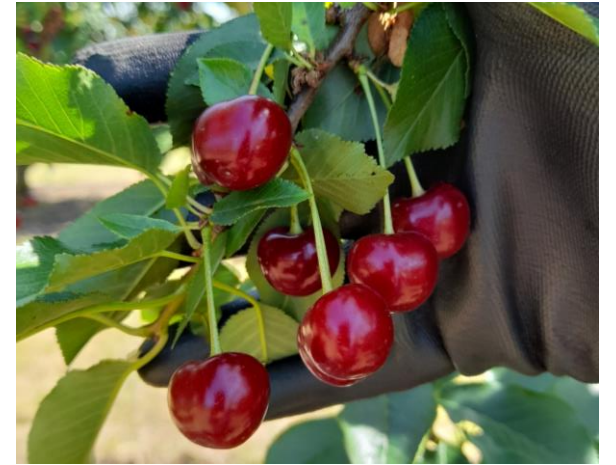

Velencei kései

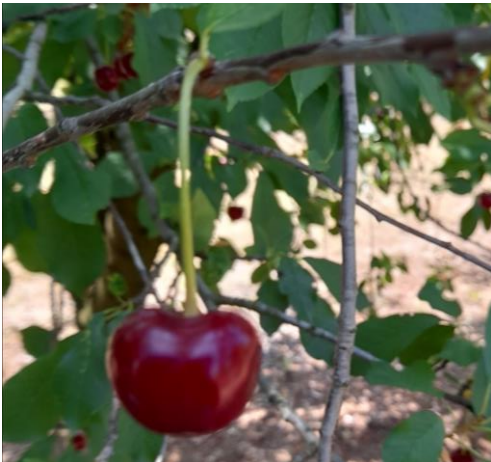

Pipacs 1

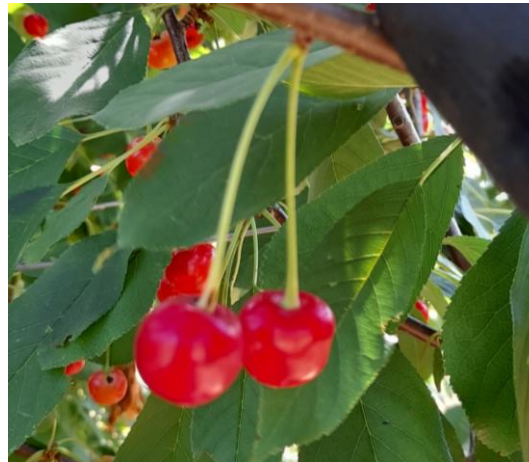

Érdi bőtermő

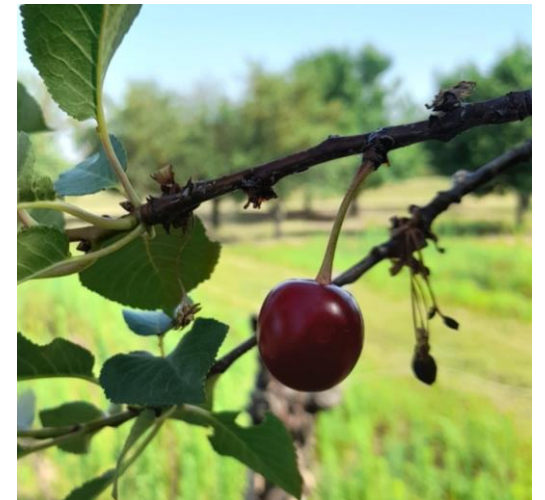

Mogyoródi kései

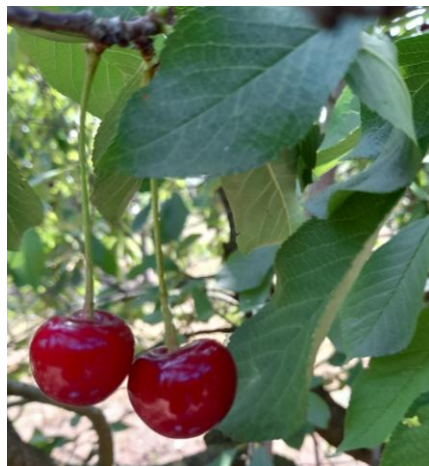

Nagy Gobet

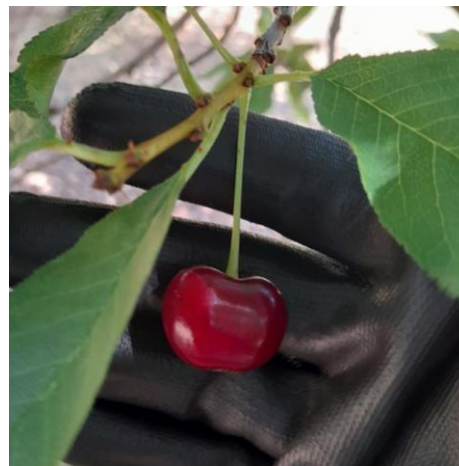

Pándy 43

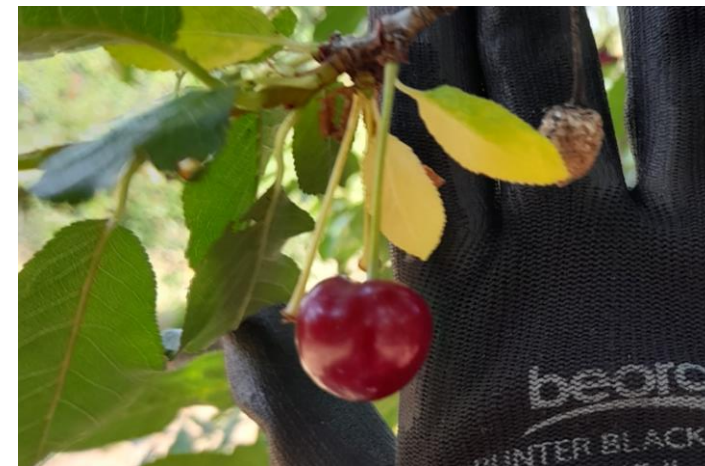

Pándy 279

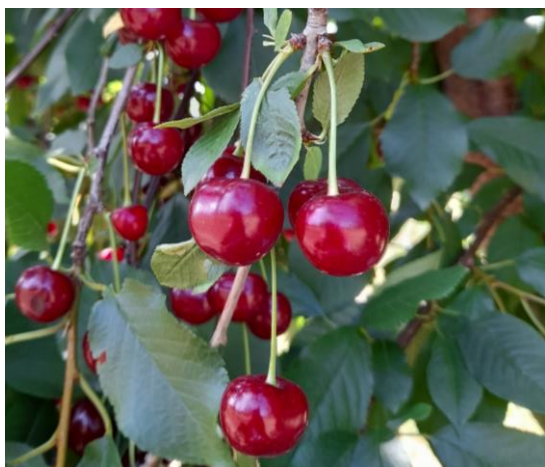

Pándy Bb. 119

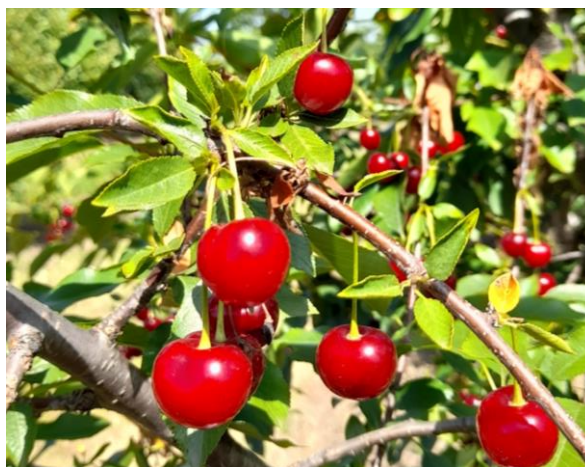

Péceli nagy

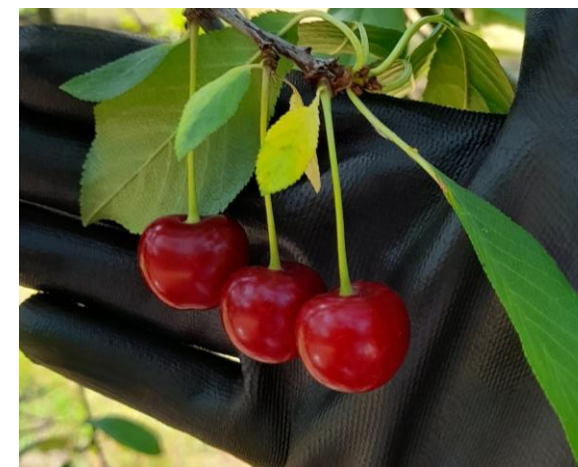

Késői cigány

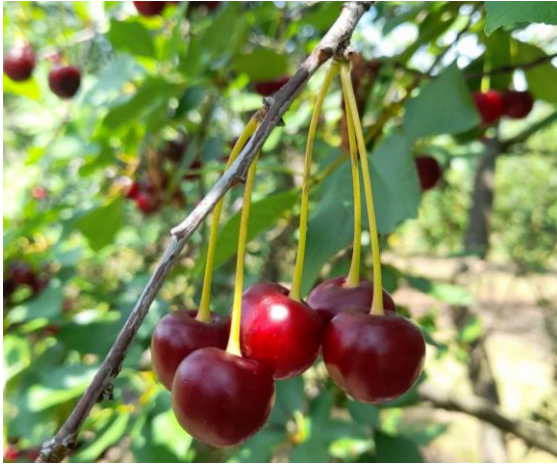

Késői parasztmeggy

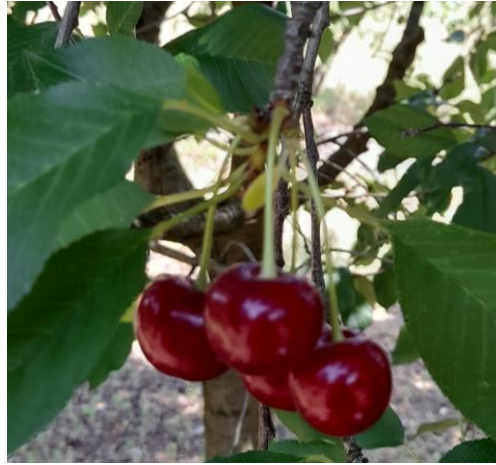

Későn virágzó

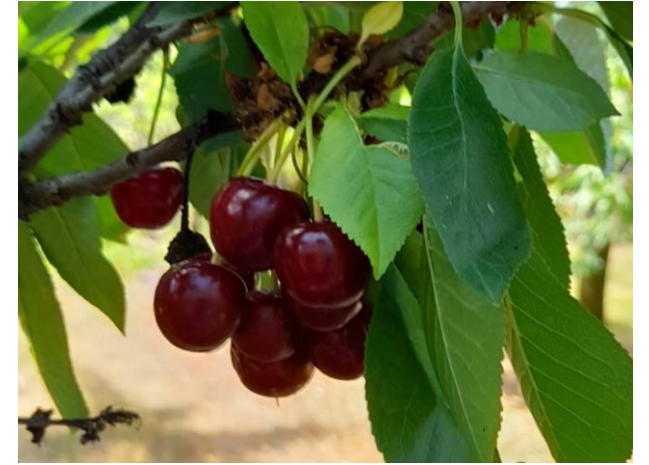

Korai cigány

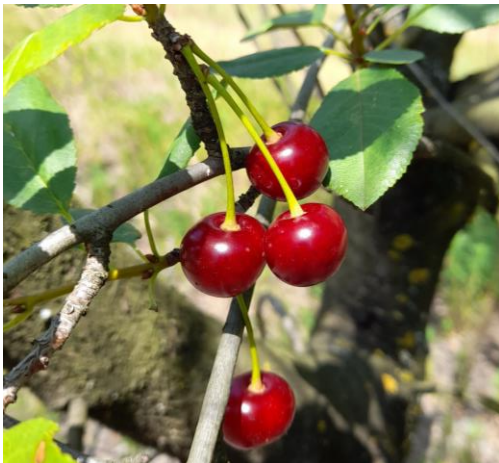

Korai Pándy

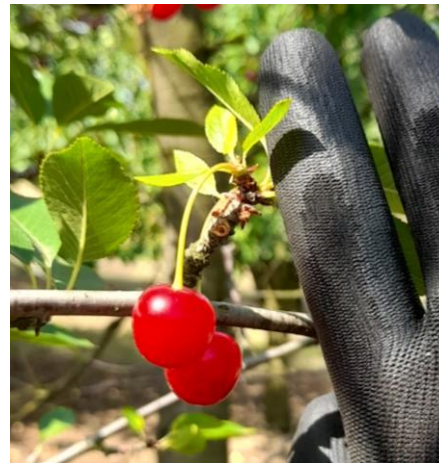

Májusi hólyag

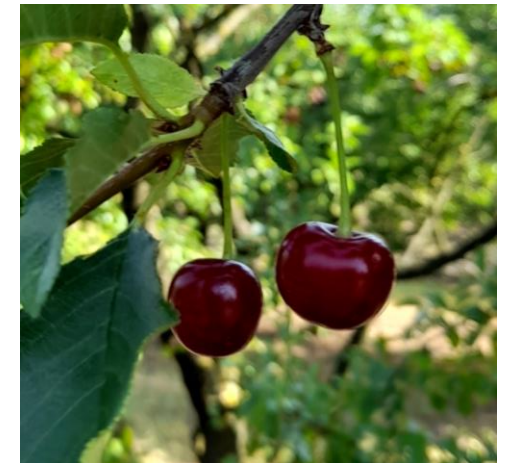

Fehérvári

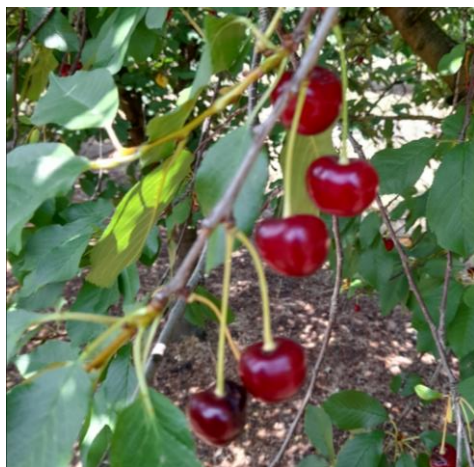

Fűzlevelű kisszemű

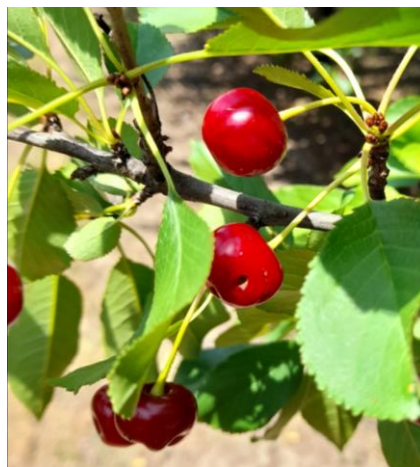

Helyi sötét

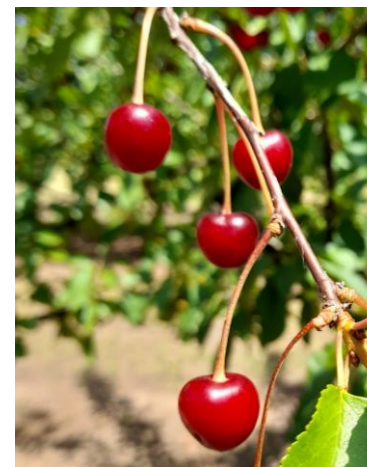

Érdi Jubileum

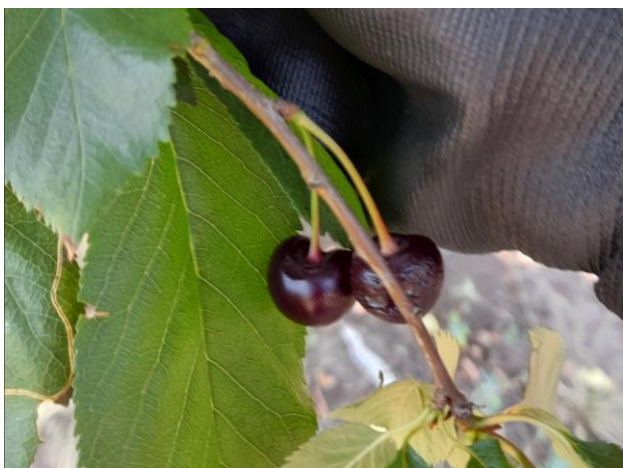

Hortenzia királynője

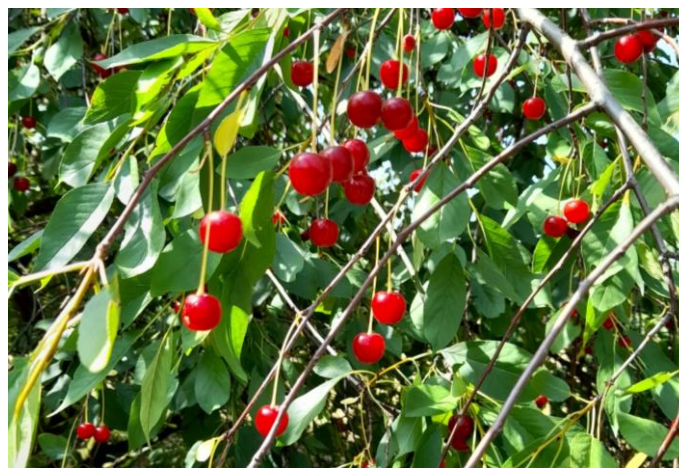

Kantorjanosi 3

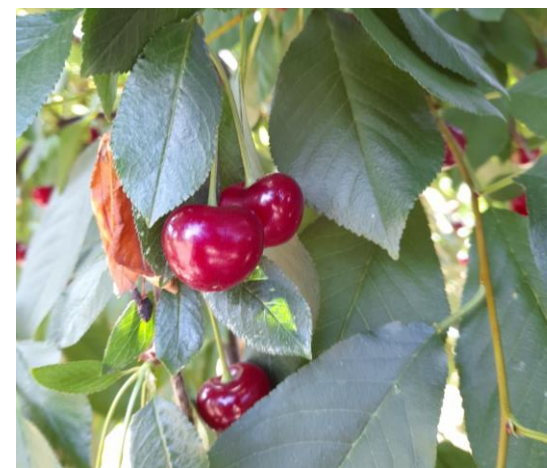

Édes pipacs

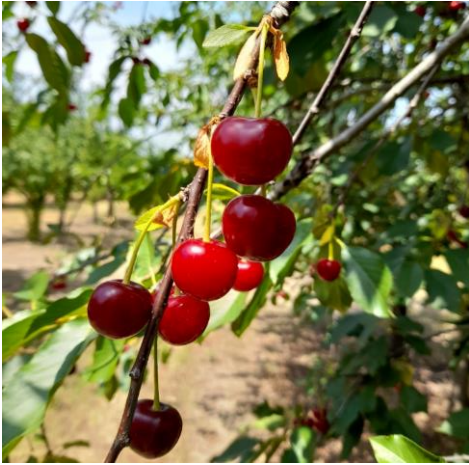

Cigánymeggy 7

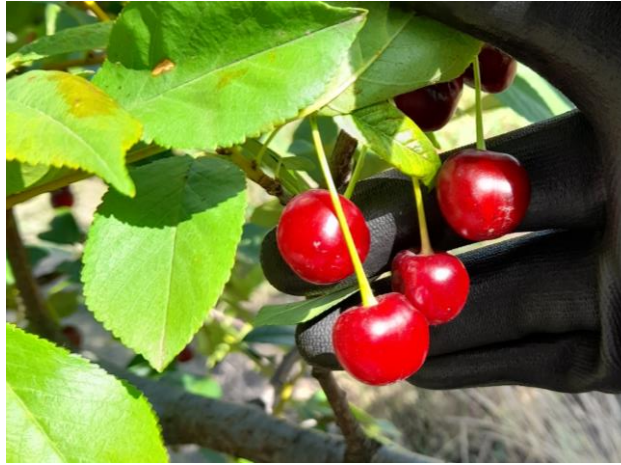

Bagy meggy

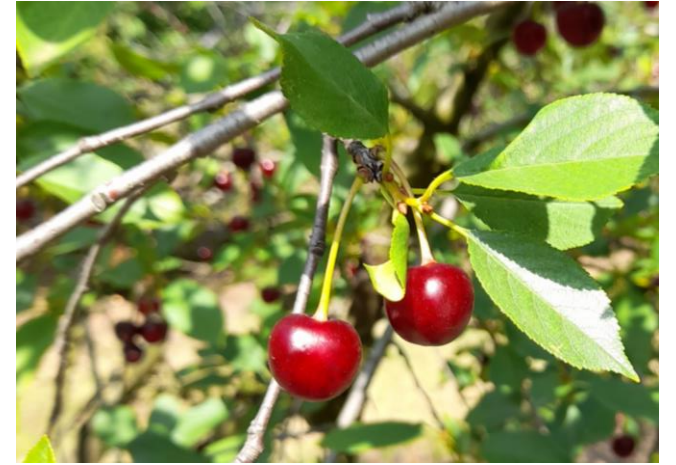

Dunabogdányi

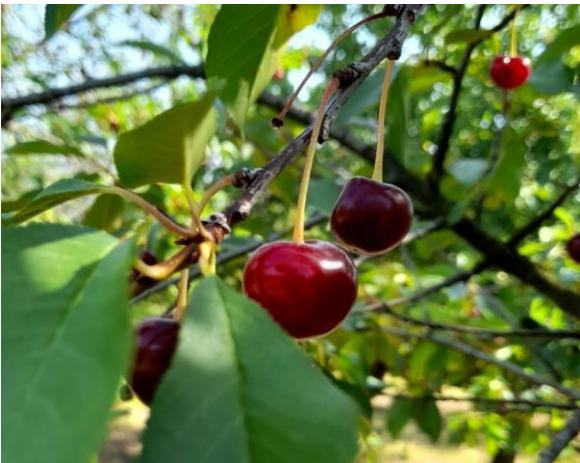

Cigány késői

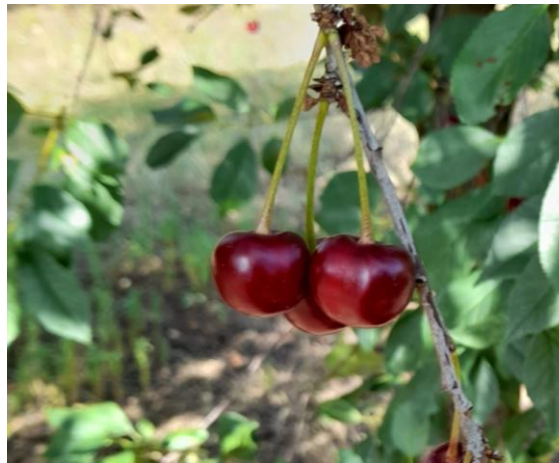

Bosnyák

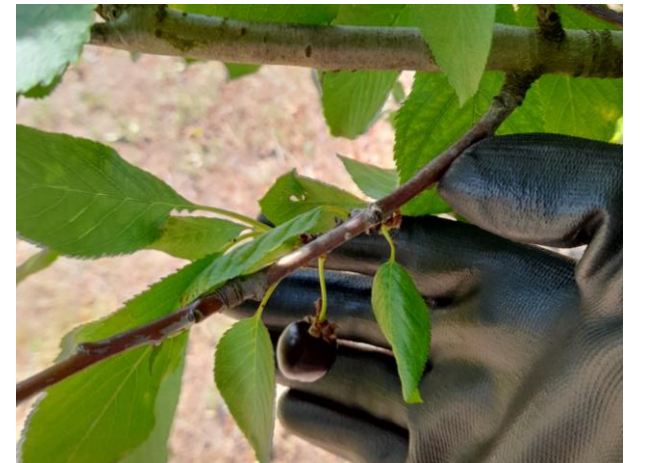

## Note:

Pictures are arranged according to colour shades from darker to lighter. Unfortunately, it was not possible to take picture of Érdi bőtermő in the Fruit Laboratory. Too few fruits were found on the tree and it was decided to prioritize the analysis for total polyphenolic content and colorimetric.

All Fruit Laboratory pictures are made by Samuel Szilagyi  
All field pictures are made by Francesco Desiderio
